# Supplementary material
Source: PubMed Central journal article supplement (PMC4636015)

## Supplementary Figure Legends

Supplementary Figure 1. Maternal weight before pregnancy and offspring weight after weaning.

A) Maternal pre-pregnancy weight was positively correlated with maternal pre-pregnancy body fat ( $p < 0.0005$ ). B) Maternal pre-pregnancy weight was positively correlated with offspring weight ( $p < 0.05$ ). C) Maternal pre-pregnancy weight was not associated with offspring intake of high-fat/sucrose diet ( $p = 0.17$ ).

Supplementary Figure 2. Maternal weight during pregnancy and offspring intake of palatable food after weaning.

A) Maternal pregnancy weight was positively correlated with maternal pre-pregnancy weight ( $p < 0.0005$ ). B) Maternal pregnancy body weight was positively correlated with offspring weight ( $p < 0.05$ ). C) Maternal pregnancy weight was not associated with offspring intake of high-fat/sucrose diet ( $p = 0.10$ ).

Supplementary Figure 3. Offspring weight at 6 and 13 months. A positive correlation was

found between offspring weight at 13 months of age and offspring weights at 6 months of age ( $p < 0.005$ ).

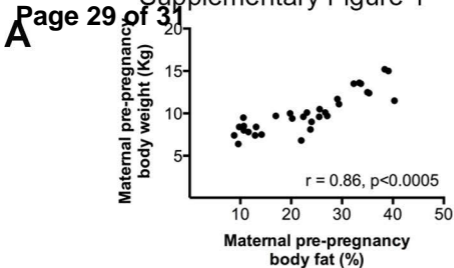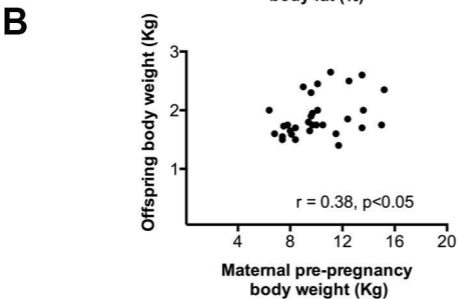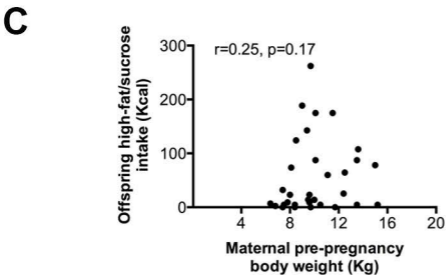

**A**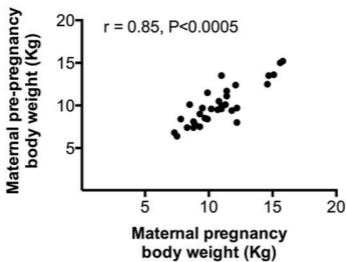**B**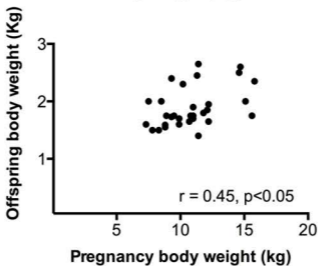**C**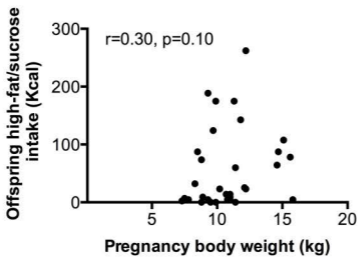

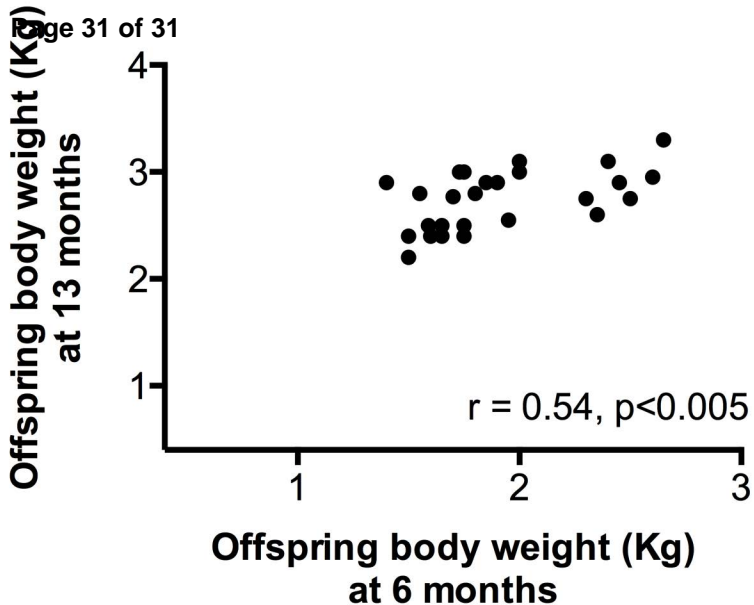

Supplement: NIHMS714364-supplement-supplement_1.pdf [file NIHMS714364-supplement-supplement_1.pdf]
